# Supplementary material for: Disruption of a Conservative Motif in the C-Terminal Loop of the KCNQ1 Channel Causes LQT Syndrome
Source: Preprints.org preprint supplement (doi:10.20944/preprints202206.0199.v1), 2022-06-14
Supplement: Supplementary file 1 [file supplementary]

**Table 1**. The parameters of IKs activation curve in CHO-K1 cells of WT, K422E/K422E and WT/K422Et groups. (* – significant difference from the control group, non-paired t-test, p<0.05).

| Group | V50 | | Slope | |
| --- | --- | --- | --- | --- |
| mean | SEM | mean | SEM |
| WT/WT, n=15 | 5.56 | 1.86 | 14.7 | 1.76 |
| WT/K422E, n=16 | 19.1* | 2.36 | 21.6* | 2.53 |
| K422E/K422E, n=17 | 22.4* | 2.67 | 22.8* | 2.83 |

**Table 2.** Characteristics of simulated action potential in control and heterozygote WT/K422E mutation models

|  | Control | WT/K422E |
| --- | --- | --- |
| APD50 (ms) | 171 | 226 |
| APD90 (ms) | 192 | 249 |
| APA (mV) | 118.6 | 118.3 |
| RMP (mV) | -85.7 | -85.5 |


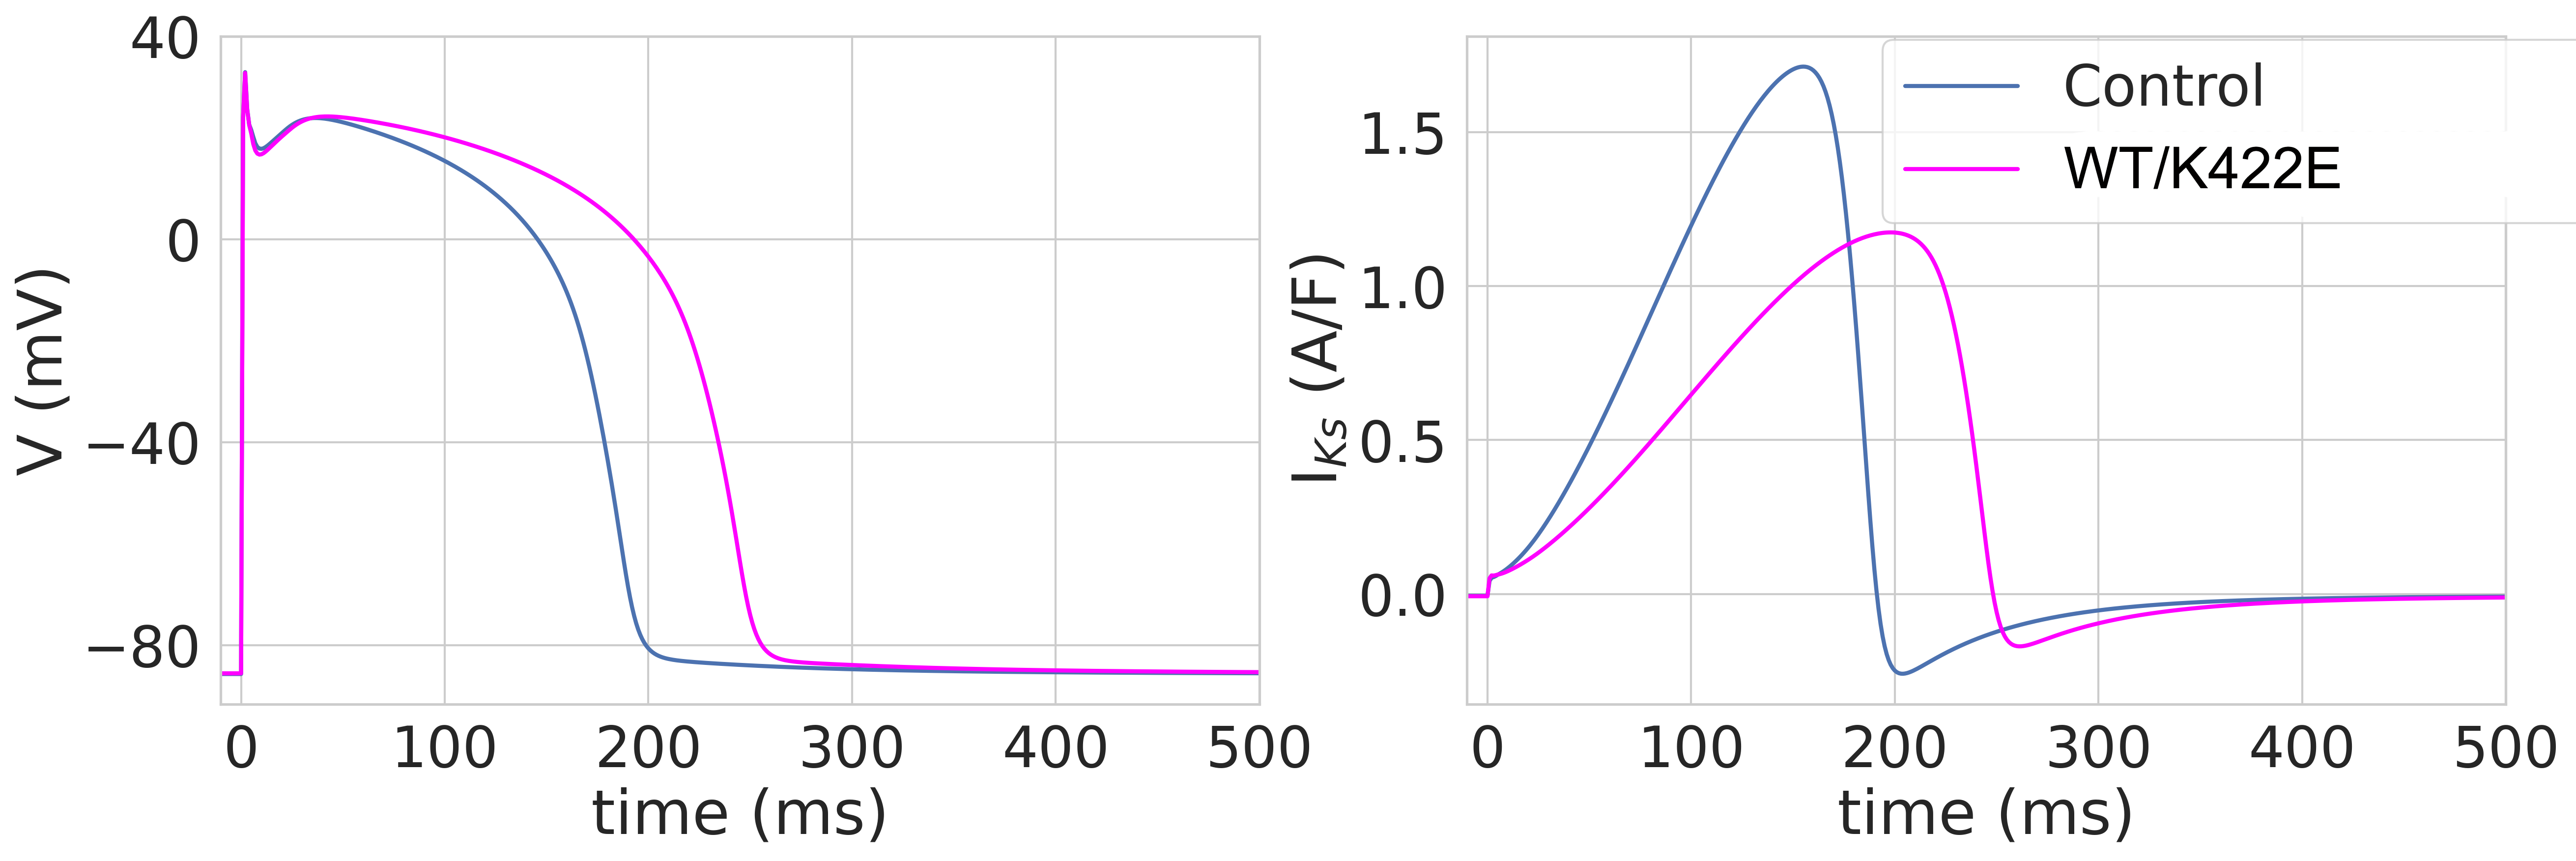


Figure S1. Simulated action potential (left panel) and IKs current (right panel) in control (WT) and heterozygote (WT/K422E) mutation models.


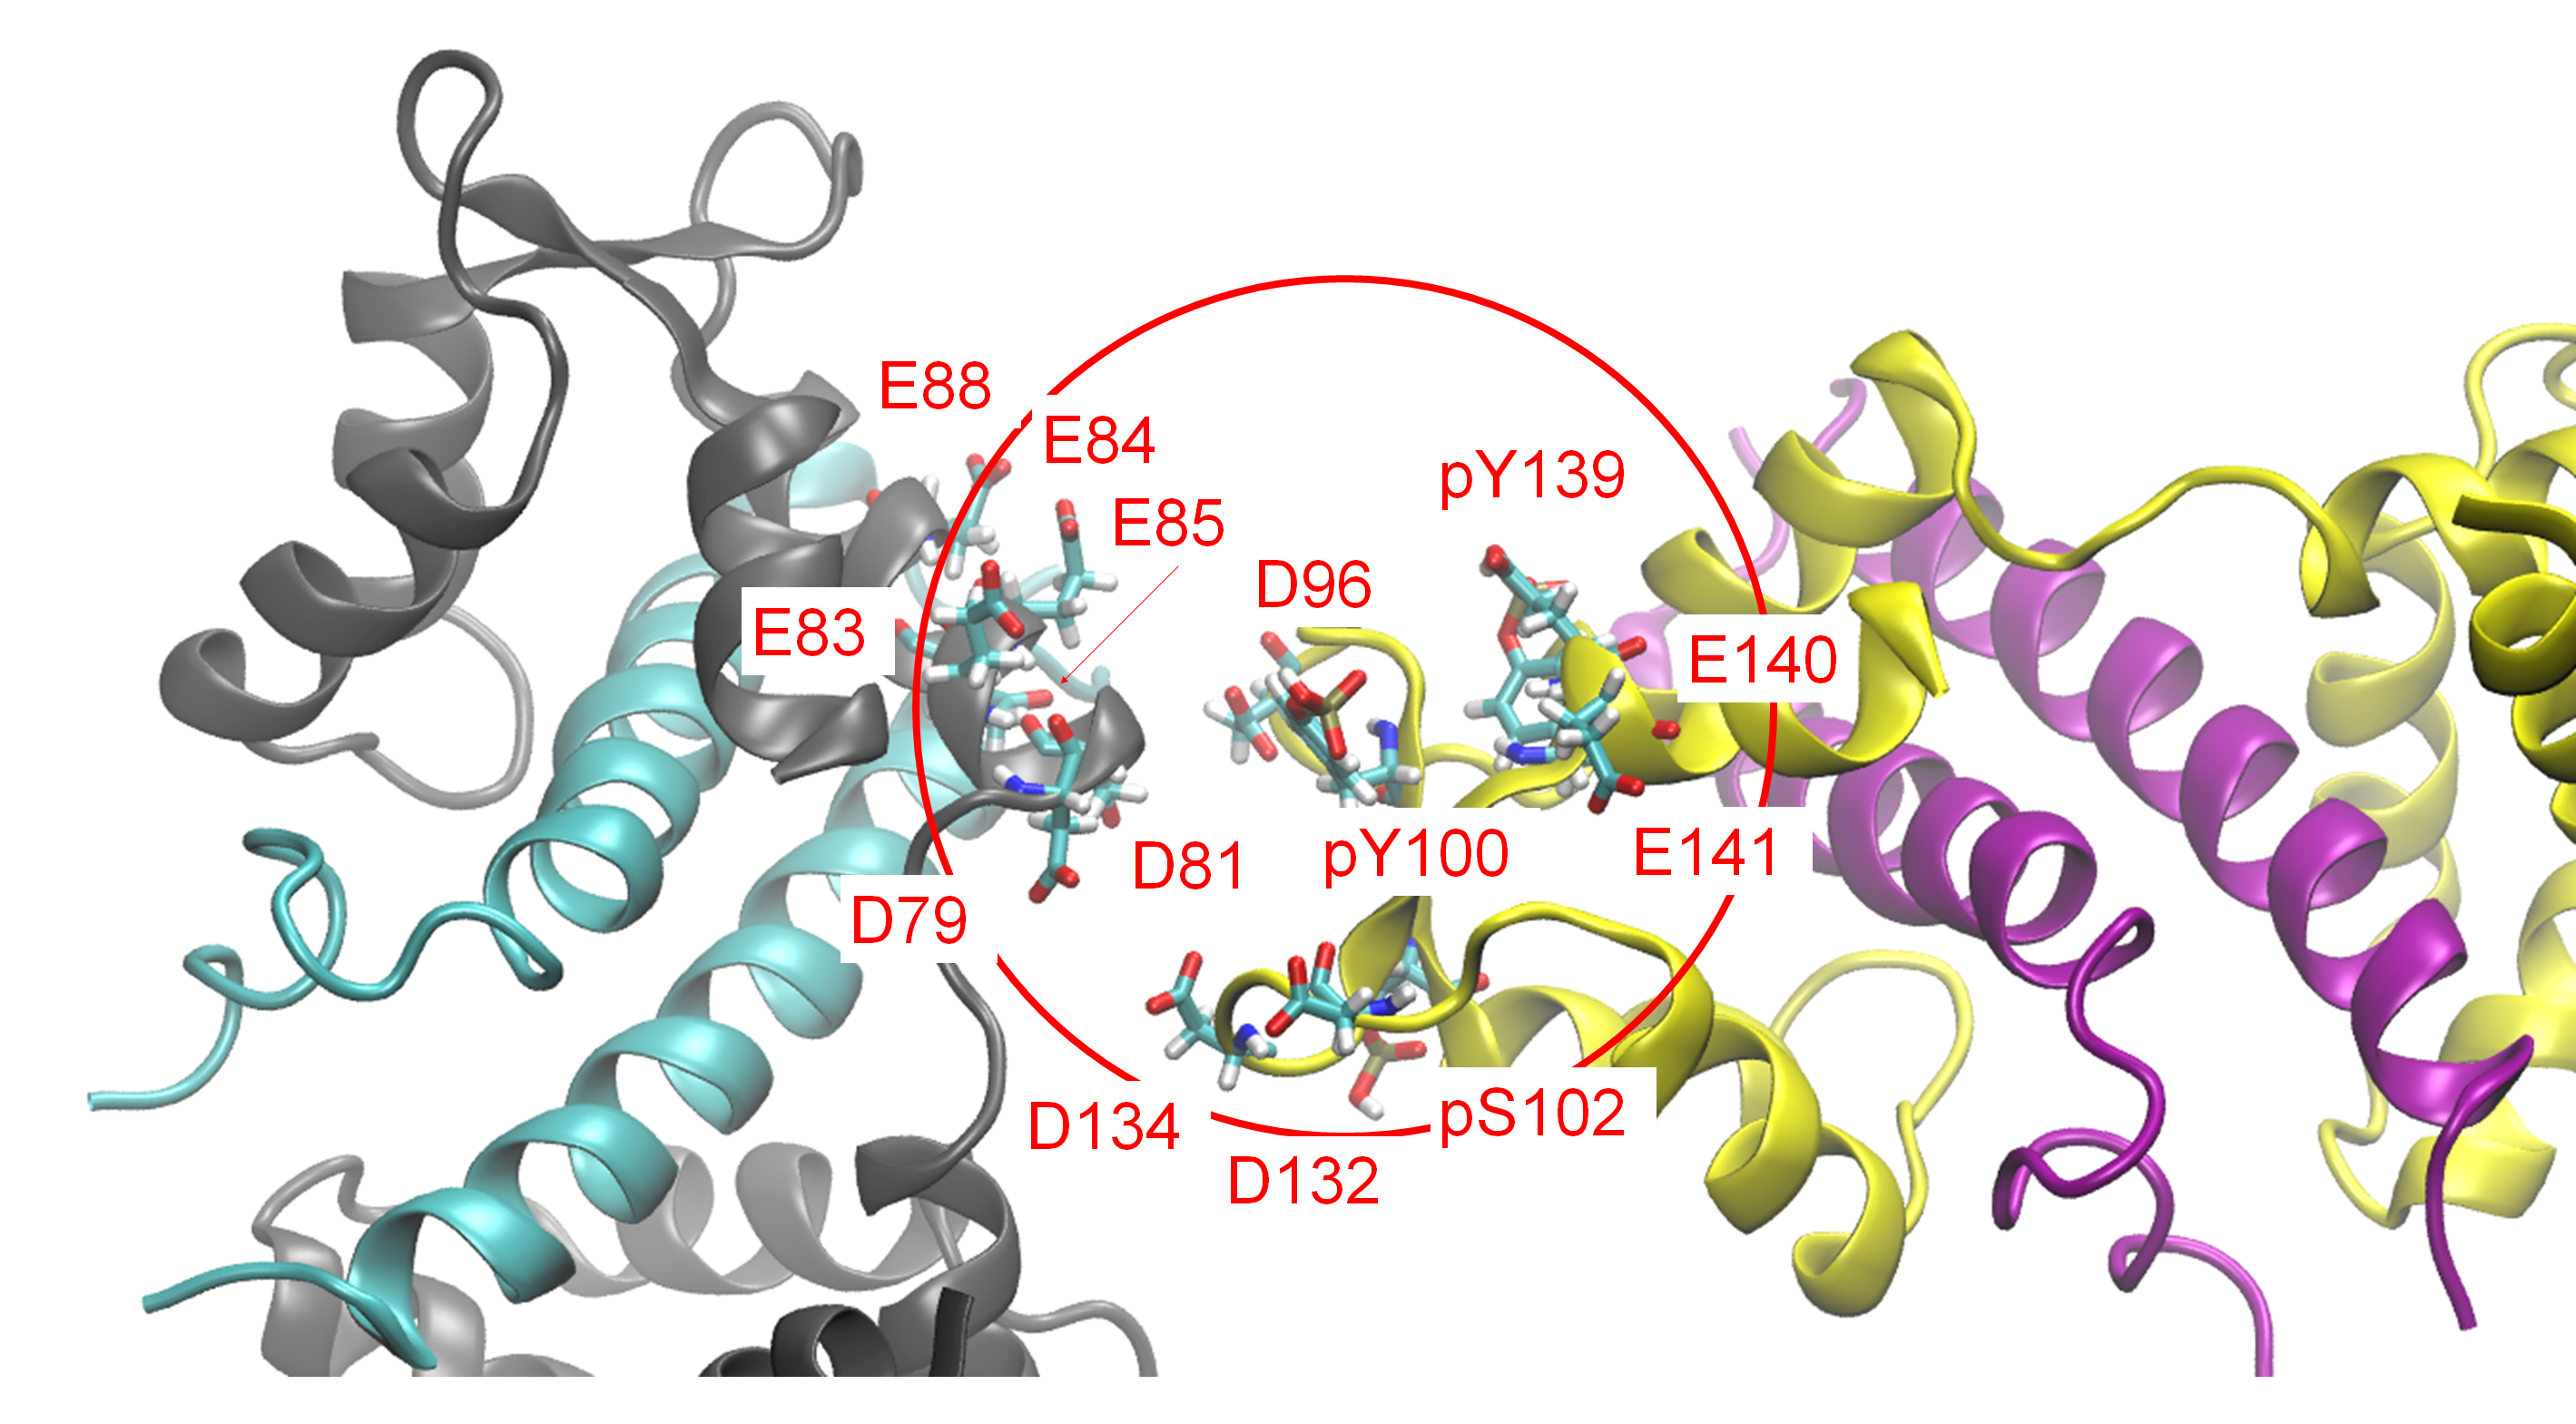


Figure S2. Fragment of KCNQ1-CaM complex. Protein chains are colored according to their IDs. CaM molecules shown in gray and yellow. Negatively charged residues at their interface shown in rod representation and subscribed. Red circle correspond to the region with the highest values of negative potential.
